# Supplementary material for: Materialism and Immorality: More Urban than Rural?
Source: MDPI journal article supplement (doi:10.3390/soc12050123), 2022-08-31
Supplement: s1 [file s1]

## 1. SOM (Supplementary Online Material)/ Online Appendix

### 1.1. Auxiliary Theory

Urbanism is not only aggressive (Burgess 1926), but also oppressive (Vaneigem 1997). Some striking examples are seen where urbanism is currently most rife, in China (Yang 2013).<sup>1</sup> Not only industrialization, but also postindustrialization has produced more alienation (Choi 2016). While there is much evidence of urbanism-alienation link, calls for more research (Parker 1978) have been largely unanswered.

Greatest cities are clearly the most competitive, aggressive, and dominant places—think of New York City, Chicago, London, Shanghai, etc. It is no wonder that aggressiveness and city are closely linked as remarked in a classic observation of city life (Burgess 1926, p. 82):

If a metropolite would "get ahead" he usually must become "aggressive," but aggressiveness on the part of one person or of a group is often an invasion of the status of other persons or groups. Hence social-distance reactions are kept in turmoil.

High density increases aggressiveness in many forms: urbanites toil longer hours (Rosenthal and Strange 2008, 2003, 2002), and there is more violence and crime in cities (Bettencourt et al. 2010, Bettencourt and West 2010, Bettencourt et al. 2007). Other animals suffer at high densities, too. Rats, for instance, become more stressed, aggressive, and kill each other (Calhoun 1962). Some species like ants and bees do thrive at high densities, and Glaeser (2011b) likes to point it out, but human nature is unlike that of bees: by one estimate we're 90% chimp and only 10% bee (Haidt 2012). Cities combine people and things in an often conflicting or even dysfunctional way:

Cities bring people and things together in manifold combinations. Indeed, that is probably the most basic definition of a city that is possible. But it is not the case that these combinations sit comfortably with one another. Indeed, they often sit very uncomfortably together. Many key urban experiences are the result of juxtapositions which are, in some sense, dysfunctional, which jar and scrape and rend. (Thrift 2005, p. 140).

And there is a clear remarkably dark side to an urban experience, the dark side that is seldom talked about:

Cities are polluted, unhealthy, tiring, overwhelming, confusing, alienating. They are places of low-wage work, insecurity, poor living conditions and dejected isolation for the many at the bottom of the social ladder daily sucked into them. They hum with the fear and anxiety linked to crime, helplessness and the close juxtaposition of strangers. They symbolize the isolation of people trapped in ghettos, segregated areas and distant dormitories, and they express the frustration and ill-temper of those locked into long hours of work (Amin 2006, p. 1011)

Steve Pile in his colorful writings about cities, for example, often invokes urban folklore characters that prey on humans in cities (e.g., vampires, werewolves, ghosts) (Pile 2005a, 2005b, Pile et al. 1999). And city is referred to as 'labyrinth' 'nightmare, or 'jungle' (Knox and Pinch 2014), or 'cancer' (White and White 1977).

### 1.2. Variable definitions and distributions.

**Table S1.** Independent variable definitions.

<sup>1</sup> It is a phenomenon of such massive magnitude that China, the country that has been urbanizing the most in the world recently, consumed 6,500 million tons of cement between 2011 and 2014—in one hundred years the United States has consumed only 4,500 million tons (Harvey 2016).

| name                                   | description                                                                                                                                                                                                                                                                                                                                                                                                                                                                                                                                             |
|----------------------------------------|---------------------------------------------------------------------------------------------------------------------------------------------------------------------------------------------------------------------------------------------------------------------------------------------------------------------------------------------------------------------------------------------------------------------------------------------------------------------------------------------------------------------------------------------------------|
| xnorsiz (urban-rural)                  | EXPANDED N.O.R.C. SIZE CODE (see below table for details)                                                                                                                                                                                                                                                                                                                                                                                                                                                                                               |
| srcbelt (urban-rural)                  | SRC BELTCODE (see below table for details)                                                                                                                                                                                                                                                                                                                                                                                                                                                                                                              |
| family income in \$1986, millions      | Income variables ( INCOME72 , INCOME , INCOME77 , INCOME82 , INCOME86 , INCOME91 , INCOME98 , INCOME06 ) are recoded in six-digit numbers and converted to 1986 dollars. The collapsed numbers above are for convenience of display only. Since this variable is based on categorical data, income is not continuous, but based on categorical mid-points and imputations. For details see GSS Methodological Report No. 64.                                                                                                                            |
| highest year of school completed       | HIGHEST YEAR OF SCHOOL COMPLETED A. "What is the highest grade in elementary school or high school that (you/your father/ your mother/your [husband/wife]) finished and got credit for? " CODE EXACT GRADE.; B. IF FINISHED 9th-12th GRADE OR DK*: "Did (you/he/she) ever get a high school diploma or a GED certificate?" [SEE D BELOW.]; C. "Did (you/he/she) complete one or more years of college for credit—not including schooling such as business college, technical or vocational school?" IF YES: "How many years did (you/he/she) complete?" |
| subjective class identification        | "If you were asked to use one of four names for your social class, which would you say you belong in: the lower class, the working class, the middle class, or the upper class? "                                                                                                                                                                                                                                                                                                                                                                       |
| age                                    | age of respondent                                                                                                                                                                                                                                                                                                                                                                                                                                                                                                                                       |
| male                                   | male                                                                                                                                                                                                                                                                                                                                                                                                                                                                                                                                                    |
| married                                | MARITAL STATUS "Are you currently—married, widowed, divorced, separated, or have you never been married?" NOTE: variable recoded to 1 if married, 0 otherwise                                                                                                                                                                                                                                                                                                                                                                                           |
| number of persons in household         | NUMBER OF PERSONS IN HOUSEHOLD "Household Size and Composition"                                                                                                                                                                                                                                                                                                                                                                                                                                                                                         |
| health                                 | CONDITION OF HEALTH "Would you say your own health, in general, is excellent, good, fair, or poor?"                                                                                                                                                                                                                                                                                                                                                                                                                                                     |
| white                                  | RACE "What race do you consider yourself?"                                                                                                                                                                                                                                                                                                                                                                                                                                                                                                              |
| liberal                                | "We hear a lot of talk these days about liberals and conservatives. I'm going to show you a seven-point scale on which the political views that people might hold are arranged from extremely liberal—point 1—to extremely conservative— point 7. Where would you place yourself on this scale?"<br>"SLGHTLY LIBERAL" or "LIBERAL" or "EXTRMLY LIBERAL"                                                                                                                                                                                                 |
| conservative                           | "We hear a lot of talk these days about liberals and conservatives. I'm going to show you a seven-point scale on which the political views that people might hold are arranged from extremely liberal—point 1—to extremely conservative— point 7. Where would you place yourself on this scale?"<br>"SLGHTLY CONSERVATIVE" or "CONSERVATIVE" or "EXTRMLY CONSERVATIVE"                                                                                                                                                                                  |
| how often r attends religious services | "How often do you attend religious services? (USE CATEGORIES AS PROBES, IF NECESSARY.)"<br>0='never' to 8='more thn once wk'                                                                                                                                                                                                                                                                                                                                                                                                                            |
| r's religious preference               | "In what religion were you raised?" protestant, catholic, jewish, none, other, buddhism, hinduism, other eastern, moslem/islam, orthodox-christian, christian, native american, inter-nondenominational                                                                                                                                                                                                                                                                                                                                                 |

Variable xnorcsiz : EXPANDED N.O.R.C. SIZE CODE

Literal Question

NORC SIZE OF PLACE

PostQuestion Text

a A suburb is defined as any incorporated area or unincorporated area

of 1,000+ (or listed as such in the U.S. Census PC (1)-A books) within

the boundaries of an SMSA but not within the limits of a central city

of the SMSA. Some SMSAs have more than one central city, e.g.,

Minneapolis-St. Paul. In these cases, both cities are coded as central

cities.

b If such an instance were to arise, a city of 50,000 or over which is

not part of an SMSA would be coded '7'.

c Unincorporated areas of over 2,499 are treated as incorporated areas

of the same size. Unincorporated areas under 1,000 are not listed by

the Census and are treated here as part of the next larger civil

division, usually the township.

The source of the data is the 1970 U.S. Census population figures

published in the PC (1) -A series, Tables 6 and 10. Practically, the

codes '6' and '10' are localities not listed in Table 6 (Population of

Incorporated Places and Unincorporated Places over 1,000). For the

1980 frame cases analogous tables from the 1980 Census were used.

#### Descriptive Text

See Appendix T, GSS Methodological Report No. 4.

Variable srcbelt : SRC BELTCODE

#### Literal Question

SRC (SURVEY RESEARCH CENTER, UNIVERSITY OF MICHIGAN) NEW BELT CODE

#### Descriptive Text

The SRC belt code is described in Appendix D: Recodes. See Appendix N

for changes across surveys. See Appendix T, GSS Methodological Report

No. 4.

## Intent of Recode

The SRC belt code (a coding system originally devised to describe rings around a metropolitan area and to categorize places by size and type simultaneously) first appeared in an article written by Bernard Laserwitz (*American Sociological Review*, v. 25, no. 2, 1960), and has been used subsequently in several SRC surveys.

Its use was discontinued in 1971 because of difficulties particularly evident in the operationalization of "adjacent and outlying areas."

For this study, however, I have revised the SRC belt code for users who might find such a variable useful. The new SRC belt code utilizes "name of place" information contained in the sampling units of the NORC Field Department.

## Method of Recode

This recode assigns codes to the place of interview. City characteristics were determined by reference to the rank ordering of SMSAs in the Statistical Abstract of the United

States, 1972, Table 20. Suburb characteristics

were determined by reference to the urbanized map in the U.S. Bureau

of the Census, 1970 Census of Population, Number of Inhabitants, Series

PC (1) -A. The "other urban" codes were assigned on the basis of

county characteristics found in Table 10 of the 1970 Census of

Population, Number of Inhabitants. For cases

from the 1980, 1990, and 2000 frames analogous tables from the 1980 or

1990 Census were used.

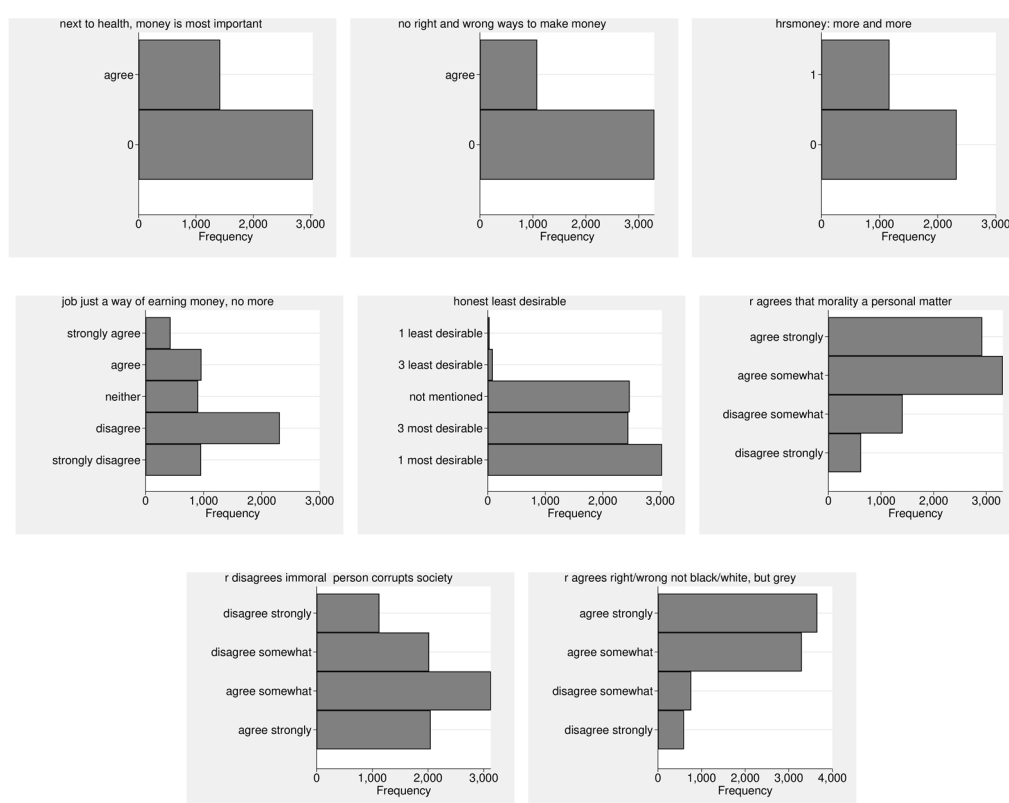

**Figure S1.** Variables' distribution.

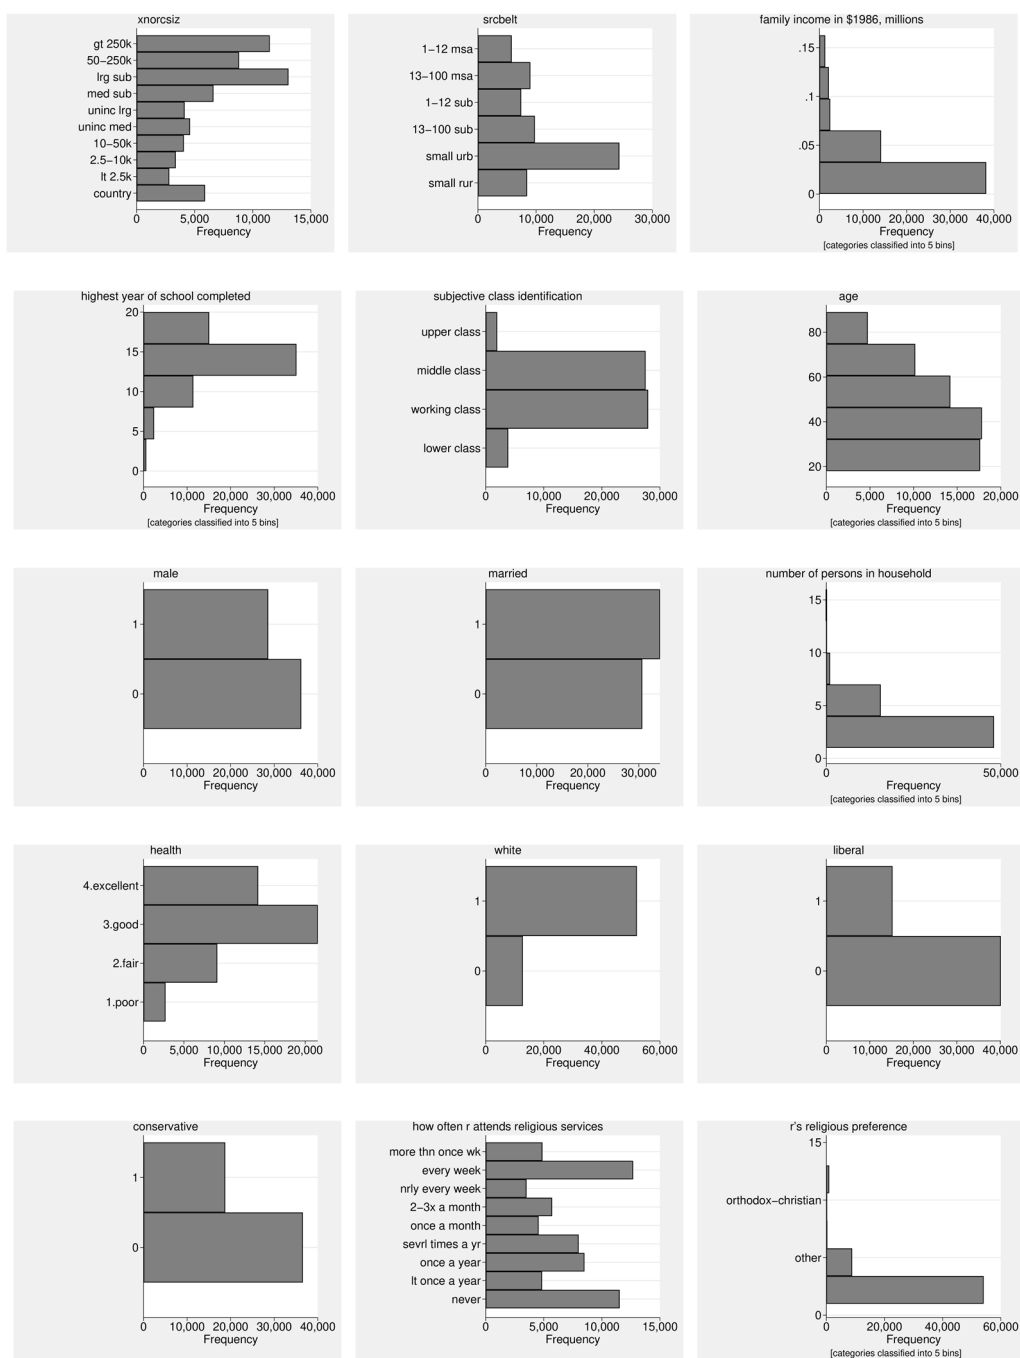

**Figure S2.** Variables' distribution.

### 1.3. The less significant or insignificant results.

|                                        | c1       | c2a      | c2b      | c3       | c4       | c5       |
|----------------------------------------|----------|----------|----------|----------|----------|----------|
| urbanism (base: country)               |          |          |          |          |          |          |
| lt 2.5k                                | -0.03    | 0.03     | -0.01    | 0.04     | 0.05     | 0.06     |
| 2.5-10k                                | -0.02    | 0.02     | -0.00    | 0.03     | 0.04     | 0.04     |
| 10-50k                                 | 0.05     | 0.07*    | 0.06+    | 0.07*    | 0.07*    | 0.06     |
| uninc med                              | -0.03    | -0.01    | 0.01     | 0.02     | 0.02     | -0.00    |
| uninc lrg                              | -0.06+   | -0.02    | 0.01     | 0.03     | 0.03     | 0.01     |
| med sub                                | -0.07*   | -0.02    | -0.02    | 0.01     | 0.02     | 0.00     |
| lrg sub                                | -0.03    | 0.00     | 0.03     | 0.05+    | 0.04     | 0.02     |
| 50-250k                                | -0.00    | 0.01     | 0.03     | 0.05     | 0.04     | 0.05     |
| gt 250k                                | 0.01     | 0.02     | 0.04     | 0.05+    | 0.02     | -0.02    |
| new england                            | 0.00     | 0.00     | 0.00     | 0.00     | 0.00     | 0.00     |
| middle atlantic                        | -0.02    | -0.05    | -0.01    | -0.04    | -0.04    | -0.01    |
| e. nor. central                        | -0.06+   | -0.08*   | -0.05    | -0.07    | -0.06    | -0.04    |
| w. nor. central                        | -0.03    | -0.06    | -0.04    | -0.07    | -0.07    | -0.06    |
| south atlantic                         | -0.03    | -0.05    | -0.05    | -0.07    | -0.08+   | -0.04    |
| e. sou. central                        | -0.17*** | -0.19*** | -0.18*** | -0.20*** | -0.20*** | -0.15**  |
| w. sou. central                        | -0.09*   | -0.09*   | -0.08*   | -0.08+   | -0.08+   | -0.02    |
| mountain                               | -0.07    | -0.10*   | -0.07    | -0.10+   | -0.08    | -0.04    |
| pacific                                | -0.12**  | -0.15*** | -0.11**  | -0.13**  | -0.13**  | -0.11*   |
| subjective class identification        |          | -0.07*** |          | -0.02    | -0.01    | -0.01    |
| family income in \$1986, millions      |          |          | -1.52*** | -1.26*** | -0.96**  | -0.82*   |
| highest year of school completed       |          |          | -0.03*** | -0.02*** | -0.03*** | -0.02*** |
| age                                    |          |          |          |          | -0.00    | -0.01+   |
| age squared                            |          |          |          |          | 0.00     | 0.00     |
| male                                   |          |          |          |          | 0.06***  | 0.06***  |
| married                                |          |          |          |          | 0.01     | 0.02     |
| number of persons in household         |          |          |          |          | -0.01    | -0.01    |
| health                                 |          |          |          |          | -0.03*** | -0.03**  |
| white                                  |          |          |          |          | -0.10*** | -0.15*** |
| liberal                                |          |          |          |          |          | -0.05*   |
| conservative                           |          |          |          |          |          | -0.01    |
| how often r attends religious services |          |          |          |          |          | -0.01*** |
| protestant                             |          |          |          |          |          | 0.00     |
| catholic                               |          |          |          |          |          | 0.09***  |
| jewish                                 |          |          |          |          |          | 0.13*    |
| none                                   |          |          |          |          |          | 0.04     |
| other                                  |          |          |          |          |          | 0.04     |
| constant                               | 0.33***  | 0.47***  | 0.65***  | 0.67***  | 0.96***  | 1.00***  |
| N                                      | 4376     | 3622     | 4049     | 3352     | 3339     | 2534     |



+ 0.10 \* 0.05 \*\* 0.01 \*\*\* 0.001; robust std err.

**Table S2.** no right and wrong ways to make money.

|                                        | d1     | d2a     | d2b     | d3      | d4       | d5       |
|----------------------------------------|--------|---------|---------|---------|----------|----------|
| urbanism (base: country)               |        |         |         |         |          |          |
| lt 2.5k                                | -0.11  | -0.11   | -0.15   | -0.15+  | -0.05    | -0.04    |
| 2.5-10k                                | -0.07  | -0.07   | -0.07   | -0.07   | -0.09    | -0.08    |
| 10-50k                                 | -0.05  | -0.04   | -0.05   | -0.05   | -0.04    | -0.06    |
| uninc med                              | -0.08+ | -0.07   | -0.07   | -0.07   | -0.10    | -0.09    |
| uninc lrg                              | -0.08+ | -0.07   | -0.07   | -0.07   | -0.10+   | -0.10+   |
| med sub                                | -0.05  | -0.04   | -0.05   | -0.04   | -0.11+   | -0.11+   |
| lrg sub                                | -0.05  | -0.04   | -0.06   | -0.06   | -0.05    | -0.05    |
| 50-250k                                | -0.06  | -0.06   | -0.07+  | -0.07+  | -0.09+   | -0.08    |
| gt 250k                                | 0.01   | 0.01    | 0.01    | 0.02    | -0.01    | -0.03    |
| new england                            | 0.00   | 0.00    | 0.00    | 0.00    | 0.00     | 0.00     |
| middle atlantic                        | -0.07  | -0.08   | -0.06   | -0.06   | -0.11    | -0.08    |
| e. nor. central                        | -0.09  | -0.09   | -0.08   | -0.08   | -0.14*   | -0.10    |
| w. nor. central                        | -0.02  | -0.03   | -0.03   | -0.03   | -0.10    | -0.05    |
| south atlantic                         | -0.08  | -0.08   | -0.08   | -0.08   | -0.14*   | -0.09    |
| e. sou. central                        | -0.10  | -0.11+  | -0.10   | -0.11   | -0.24**  | -0.13    |
| w. sou. central                        | -0.10+ | -0.11+  | -0.12*  | -0.12*  | -0.20**  | -0.10    |
| mountain                               | -0.08  | -0.08   | -0.08   | -0.08   | -0.17*   | -0.14+   |
| pacific                                | -0.00  | -0.01   | -0.00   | -0.00   | -0.09    | -0.09    |
| subjective class identification        |        | -0.04** |         | -0.02   | -0.00    | 0.01     |
| family income in \$1986, millions      |        |         | -0.49   | -0.39   | -0.75    | -0.79    |
| highest year of school completed       |        |         | -0.01** | -0.01** | -0.01    | -0.01    |
| age                                    |        |         |         |         | -0.00    | -0.00    |
| age squared                            |        |         |         |         | 0.00     | 0.00     |
| male                                   |        |         |         |         | 0.10***  | 0.06*    |
| married                                |        |         |         |         | -0.11*** | -0.05    |
| number of persons in household         |        |         |         |         | -0.01    | -0.01    |
| health                                 |        |         |         |         | -0.00    | 0.01     |
| white                                  |        |         |         |         | -0.01    | -0.04    |
| liberal                                |        |         |         |         |          | 0.04     |
| conservative                           |        |         |         |         |          | -0.17*** |
| how often r attends religious services |        |         |         |         |          | -0.05*** |
| protestant                             |        |         |         |         |          | 0.00     |

|                         |         |         |         |         |         |         |
|-------------------------|---------|---------|---------|---------|---------|---------|
| catholic                |         |         |         |         |         | 0.00    |
| jewish                  |         |         |         |         |         | 0.15    |
| none                    |         |         |         |         |         | 0.00    |
| other                   |         |         |         |         |         | -0.01   |
| buddhism                |         |         |         |         |         | 0.22    |
| hinduism                |         |         |         |         |         | -0.62*  |
| other eastern           |         |         |         |         |         | 0.15    |
| moslem/islam            |         |         |         |         |         | -0.12   |
| orthodox-christian      |         |         |         |         |         | -0.49   |
| christian               |         |         |         |         |         | -0.05   |
| native american         |         |         |         |         |         | 0.43*   |
| inter-nondenominational |         |         |         |         |         | 0.00    |
| constant                | 3.10*** | 3.21*** | 3.28*** | 3.30*** | 3.55*** | 3.60*** |
| N                       | 8269    | 8226    | 7329    | 7305    | 4797    | 4676    |

+ 0.10 \* 0.05 \*\* 0.01 \*\*\* 0.001; robust std err.

**Table S3.** r agrees that morality a personal matter.

|                          | f1    | f2a   | f2b    | f3    | f4    | f5    |
|--------------------------|-------|-------|--------|-------|-------|-------|
| urbanism (base: country) |       |       |        |       |       |       |
| lt 2.5k                  | 0.02  | 0.06  | 0.03   | 0.08  | 0.04  | 0.01  |
| 2.5-10k                  | 0.11* | 0.11+ | 0.11*  | 0.11+ | 0.08  | 0.06  |
| 10-50k                   | 0.03  | 0.05  | 0.07   | 0.07  | 0.04  | 0.03  |
| uninc med                | -0.03 | 0.01  | 0.00   | 0.02  | -0.04 | -0.07 |
| uninc lrg                | -0.06 | 0.04  | 0.01   | 0.05  | 0.01  | -0.03 |
| med sub                  | 0.01  | 0.05  | 0.05   | 0.06  | 0.06  | 0.05  |
| lrg sub                  | 0.01  | 0.07  | 0.07+  | 0.10* | 0.05  | 0.02  |
| 50-250k                  | 0.04  | 0.08  | 0.06   | 0.08  | 0.02  | 0.00  |
| gt 250k                  | 0.08* | 0.10* | 0.10** | 0.10* | 0.05  | 0.02  |
| new england              | 0.00  | 0.00  | 0.00   | 0.00  | 0.00  | 0.00  |
| middle atlantic          | 0.05  | 0.10* | 0.04   | 0.08+ | 0.09+ | 0.09+ |
| e. nor. central          | 0.02  | 0.06  | 0.00   | 0.03  | 0.04  | 0.04  |
| w. nor. central          | -0.03 | 0.03  | -0.07  | -0.02 | 0.01  | 0.02  |
| south atlantic           | 0.07+ | 0.11* | 0.06   | 0.09+ | 0.07  | 0.09+ |
| e. sou. central          | 0.08  | 0.09+ | 0.04   | 0.04  | 0.09  | 0.11  |
| w. sou. central          | 0.09* | 0.12* | 0.05   | 0.09+ | 0.06  | 0.07  |

|                                        |         |          |          |          |          |          |
|----------------------------------------|---------|----------|----------|----------|----------|----------|
| mountain                               | -0.02   | -0.01    | -0.05    | -0.04    | -0.00    | -0.00    |
| pacific                                | 0.02    | 0.06     | 0.00     | 0.04     | 0.05     | 0.07     |
| subjective class identification        |         | -0.10*** |          | -0.05**  | -0.05*   | -0.06**  |
| family income in \$1986, millions      |         |          | -2.34*** | -2.31*** | -1.55*** | -1.58*** |
| highest year of school completed       |         |          | -0.02*** | -0.01**  | -0.01**  | -0.01**  |
| age                                    |         |          |          |          | 0.00     | 0.00     |
| age squared                            |         |          |          |          | -0.00    | -0.00    |
| male                                   |         |          |          |          | 0.11***  | 0.09***  |
| married                                |         |          |          |          | -0.07**  | -0.08**  |
| number of persons in household         |         |          |          |          | -0.01    | -0.00    |
| health                                 |         |          |          |          | -0.02    | -0.02    |
| white                                  |         |          |          |          | -0.11*** | -0.11*** |
| liberal                                |         |          |          |          |          | 0.01     |
| conservative                           |         |          |          |          |          | 0.06*    |
| how often r attends religious services |         |          |          |          |          | -0.01    |
| protestant                             |         |          |          |          |          | 0.00     |
| catholic                               |         |          |          |          |          | 0.03     |
| jewish                                 |         |          |          |          |          | 0.19*    |
| none                                   |         |          |          |          |          | -0.01    |
| other                                  |         |          |          |          |          | -0.04    |
| buddhism                               |         |          |          |          |          | 0.07     |
| hinduism                               |         |          |          |          |          | -0.16    |
| other eastern                          |         |          |          |          |          | -0.18*   |
| moslem/islam                           |         |          |          |          |          | -0.09    |
| orthodox-christian                     |         |          |          |          |          | 0.60***  |
| christian                              |         |          |          |          |          | -0.03    |
| native american                        |         |          |          |          |          | -0.15+   |
| inter-nondenominational                |         |          |          |          |          | -0.21    |
| constant                               | 0.26*** | 0.46***  | 0.57***  | 0.58***  | 0.82***  | 0.82***  |
| N                                      | 3495    | 2481     | 3195     | 2309     | 1758     | 1688     |

+ 0.10 \* 0.05 \*\* 0.01 \*\*\* 0.001; robust std err.

**Table S4.** hrsmoney: more and more.

|                          | g1 | g2a | g2b | g3 | g4 | g5 |
|--------------------------|----|-----|-----|----|----|----|
| urbanism (base: country) |    |     |     |    |    |    |

|                                        |          |          |          |          |          |          |
|----------------------------------------|----------|----------|----------|----------|----------|----------|
| lt 2.5k                                | -0.05    | -0.06    | -0.04    | -0.05    | -0.03    | -0.05    |
| 2.5-10k                                | 0.02     | 0.02     | -0.00    | -0.01    | -0.01    | 0.00     |
| 10-50k                                 | 0.04     | 0.04     | -0.02    | -0.02    | -0.04    | -0.07    |
| uninc med                              | 0.03     | 0.02     | -0.02    | -0.02    | 0.03     | 0.02     |
| uninc lrg                              | 0.02     | 0.01     | -0.03    | -0.03    | -0.01    | -0.02    |
| med sub                                | 0.05     | 0.05     | 0.00     | 0.00     | -0.00    | -0.02    |
| lrg sub                                | 0.11**   | 0.10*    | 0.05     | 0.05     | 0.04     | 0.02     |
| 50-250k                                | 0.07+    | 0.06     | 0.01     | 0.01     | -0.01    | -0.00    |
| gt 250k                                | 0.10*    | 0.09*    | 0.03     | 0.03     | -0.00    | -0.04    |
| new england                            | 0.00     | 0.00     | 0.00     | 0.00     | 0.00     | 0.00     |
| middle atlantic                        | -0.08    | -0.08    | -0.07    | -0.08    | -0.06    | -0.03    |
| e. nor. central                        | -0.14**  | -0.14**  | -0.10*   | -0.11*   | -0.07    | -0.01    |
| w. nor. central                        | -0.12*   | -0.12*   | -0.12*   | -0.12*   | -0.09    | -0.02    |
| south atlantic                         | -0.27*** | -0.26*** | -0.26*** | -0.27*** | -0.22*** | -0.12+   |
| e. sou. central                        | -0.36*** | -0.36*** | -0.35*** | -0.36*** | -0.40*** | -0.25**  |
| w. sou. central                        | -0.28*** | -0.28*** | -0.28*** | -0.28*** | -0.31*** | -0.17*   |
| mountain                               | -0.18**  | -0.18**  | -0.17**  | -0.18**  | -0.15*   | -0.08    |
| pacific                                | -0.18*** | -0.18*** | -0.16**  | -0.17**  | -0.16*   | -0.15*   |
| subjective class identification        |          | 0.04**   |          | -0.00    | -0.01    | 0.00     |
| family income in \$1986, millions      |          |          | -0.31    | -0.27    | 0.23     | 0.15     |
| highest year of school completed       |          |          | 0.03***  | 0.03***  | 0.04***  | 0.04***  |
| age                                    |          |          |          |          | -0.00    | 0.00     |
| age squared                            |          |          |          |          | 0.00     | 0.00     |
| male                                   |          |          |          |          | -0.06*   | -0.09*** |
| married                                |          |          |          |          | -0.11*** | -0.05+   |
| number of persons in household         |          |          |          |          | -0.01    | -0.00    |
| health                                 |          |          |          |          | -0.02    | -0.00    |
| white                                  |          |          |          |          | 0.00     | -0.02    |
| liberal                                |          |          |          |          |          | 0.03     |
| conservative                           |          |          |          |          |          | -0.21*** |
| how often r attends religious services |          |          |          |          |          | -0.05*** |
| protestant                             |          |          |          |          |          | 0.00     |
| catholic                               |          |          |          |          |          | 0.11***  |
| jewish                                 |          |          |          |          |          | 0.19**   |
| none                                   |          |          |          |          |          | 0.02     |
| other                                  |          |          |          |          |          | 0.02     |
| buddhism                               |          |          |          |          |          | 0.16     |
| hinduism                               |          |          |          |          |          | 0.13     |
| other eastern                          |          |          |          |          |          | 0.28     |
| moslem/islam                           |          |          |          |          |          | 0.11     |

|                         |         |         |         |         |         |         |
|-------------------------|---------|---------|---------|---------|---------|---------|
| orthodox-christian      |         |         |         |         |         | -0.17   |
| christian               |         |         |         |         |         | 0.06    |
| native american         |         |         |         |         |         | 0.01    |
| inter-nondenominational |         |         |         |         |         | -0.05   |
| constant                | 3.31*** | 3.22*** | 2.97*** | 2.98*** | 3.11*** | 3.01*** |
| N                       | 8311    | 8267    | 7351    | 7327    | 4808    | 4687    |

+ 0.10 \* 0.05 \*\* 0.01 \*\*\* 0.001; robust std err.

**Table S5.** r agrees right/wrong not black/white.

#### 1.4. Results using alternative measure of urbanicity, rank of MSA.

Results are similar but weaker arguably due to lower precision of this measure of urbanicity.

|                                   | a1      | a2a     | a2b     | a3      | a4      | a5      |
|-----------------------------------|---------|---------|---------|---------|---------|---------|
| small rur                         | 0.00    | 0.00    | 0.00    | 0.00    | 0.00    | 0.00    |
| small urb                         | 0.01    | 0.03    | 0.01    | 0.02    | 0.03    | 0.03    |
| 13-100 sub                        | 0.08*   | 0.08*   | 0.07+   | 0.07    | 0.04    | 0.03    |
| 1-12 sub                          | 0.09*   | 0.11*   | 0.08+   | 0.10*   | 0.11+   | 0.03    |
| 13-100 msa                        | 0.06+   | 0.10*   | 0.05    | 0.08+   | 0.04    | 0.03    |
| 1-12 msa                          | 0.28*** | 0.31*** | 0.29*** | 0.31*** | 0.25*** | 0.24*** |
| new england                       | 0.00    | 0.00    | 0.00    | 0.00    | 0.00    | 0.00    |
| middle atlantic                   | 0.02    | -0.02   | 0.04    | -0.01   | -0.11   | -0.09   |
| e. nor. central                   | -0.05   | -0.08   | -0.04   | -0.07   | -0.17*  | -0.13   |
| w. nor. central                   | -0.10+  | -0.15*  | -0.08   | -0.13+  | -0.14   | -0.08   |
| south atlantic                    | -0.12*  | -0.14*  | -0.11*  | -0.11+  | -0.23** | -0.15+  |
| e. sou. central                   | -0.07   | -0.09   | -0.06   | -0.07   | -0.18*  | -0.10   |
| w. sou. central                   | 0.03    | 0.01    | 0.05    | 0.03    | -0.04   | -0.03   |
| mountain                          | 0.02    | -0.00   | 0.02    | 0.01    | -0.07   | -0.04   |
| pacific                           | -0.04   | -0.04   | -0.03   | -0.03   | -0.14+  | -0.12   |
| subjective class identification   |         | 0.00    |         | 0.01    | 0.02    | 0.03    |
| family income in \$1986, millions |         |         | 0.01    | -0.39   | 0.50    | 0.02    |
| highest year of school completed  |         |         | 0.00    | 0.01*   | 0.01    | 0.01+   |
| age                               |         |         |         |         | -0.01** | -0.01*  |
| age squared                       |         |         |         |         | 0.00*   | 0.00*   |
| male                              |         |         |         |         | 0.07**  | 0.07*   |
| married                           |         |         |         |         | -0.01   | -0.00   |

|                                        |         |         |         |         |         |         |
|----------------------------------------|---------|---------|---------|---------|---------|---------|
| number of persons in household         |         |         |         |         | -0.00   | 0.00    |
| health                                 |         |         |         |         | -0.03+  | -0.03   |
| white                                  |         |         |         |         | -0.08   | -0.10+  |
| liberal                                |         |         |         |         |         | 0.02    |
| conservative                           |         |         |         |         |         | -0.01   |
| how often r attends religious services |         |         |         |         |         | -0.01   |
| protestant                             |         |         |         |         |         | 0.00    |
| catholic                               |         |         |         |         |         | 0.10*   |
| jewish                                 |         |         |         |         |         | 0.10    |
| none                                   |         |         |         |         |         | 0.09    |
| other                                  |         |         |         |         |         | 0.14    |
| constant                               | 2.00*** | 1.96*** | 1.94*** | 1.84*** | 2.41*** | 2.25*** |
| N                                      | 8059    | 6491    | 7483    | 6050    | 3899    | 3032    |

+ 0.10 \* 0.05 \*\* 0.01 \*\*\* 0.001; robust std err.

**Table S6.** honest least desirable.

|                                   | b1      | b2a      | b2b      | b3       | b4       | b5       |
|-----------------------------------|---------|----------|----------|----------|----------|----------|
| small rur                         | 0.00    | 0.00     | 0.00     | 0.00     | 0.00     | 0.00     |
| small urb                         | 0.00    | 0.00     | 0.04*    | 0.03     | 0.04+    | 0.05+    |
| 13-100 sub                        | 0.05+   | 0.07*    | 0.11***  | 0.11***  | 0.12***  | 0.13***  |
| 1-12 sub                          | 0.05    | 0.05     | 0.12***  | 0.12***  | 0.12***  | 0.11**   |
| 13-100 msa                        | 0.03    | 0.03     | 0.06*    | 0.06*    | 0.04     | 0.04     |
| 1-12 msa                          | 0.14*** | 0.18***  | 0.18***  | 0.20***  | 0.16***  | 0.16***  |
| new england                       | 0.00    | 0.00     | 0.00     | 0.00     | 0.00     | 0.00     |
| middle atlantic                   | 0.01    | 0.01     | 0.03     | 0.02     | 0.04     | 0.01     |
| e. nor. central                   | -0.03   | -0.04    | -0.03    | -0.03    | -0.02    | -0.02    |
| w. nor. central                   | -0.04   | -0.06    | -0.05    | -0.07    | -0.06    | -0.06    |
| south atlantic                    | 0.00    | -0.00    | -0.03    | -0.03    | -0.04    | -0.03    |
| e. sou. central                   | -0.06   | -0.08    | -0.08+   | -0.10*   | -0.10*   | -0.07    |
| w. sou. central                   | -0.05   | -0.07    | -0.05    | -0.06    | -0.04    | -0.02    |
| mountain                          | -0.06   | -0.06    | -0.08+   | -0.07    | -0.06    | -0.07    |
| pacific                           | -0.08*  | -0.10*   | -0.07+   | -0.09*   | -0.08+   | -0.07    |
| subjective class identification   |         | -0.04*** |          | 0.02+    | 0.02     | 0.02     |
| family income in \$1986, millions |         |          | -1.60*** | -1.71*** | -1.40*** | -1.25**  |
| highest year of school completed  |         |          | -0.04*** | -0.04*** | -0.03*** | -0.03*** |

|                                        |         |         |         |         |          |          |
|----------------------------------------|---------|---------|---------|---------|----------|----------|
| age                                    |         |         |         |         | 0.00     | 0.00     |
| age squared                            |         |         |         |         | 0.00     | 0.00     |
| male                                   |         |         |         |         | 0.02     | 0.03+    |
| married                                |         |         |         |         | 0.04*    | 0.04+    |
| number of persons in household         |         |         |         |         | -0.00    | -0.00    |
| health                                 |         |         |         |         | -0.02+   | -0.01    |
| white                                  |         |         |         |         | -0.21*** | -0.23*** |
| liberal                                |         |         |         |         |          | -0.02    |
| conservative                           |         |         |         |         |          | -0.01    |
| how often r attends religious services |         |         |         |         |          | -0.02*** |
| protestant                             |         |         |         |         |          | 0.00     |
| catholic                               |         |         |         |         |          | 0.05*    |
| jewish                                 |         |         |         |         |          | 0.08     |
| none                                   |         |         |         |         |          | -0.03    |
| other                                  |         |         |         |         |          | -0.01    |
| constant                               | 0.33*** | 0.43*** | 0.77*** | 0.71*** | 0.69***  | 0.67***  |
| N                                      | 4463    | 3694    | 4120    | 3410    | 3395     | 2573     |

+ 0.10 \* 0.05 \*\* 0.01 \*\*\* 0.001; robust std err.

**Table S7.** next to health, money is most important.

|                 | c1       | c2a      | c2b      | c3       | c4       | c5      |
|-----------------|----------|----------|----------|----------|----------|---------|
| small rur       | 0.00     | 0.00     | 0.00     | 0.00     | 0.00     | 0.00    |
| small urb       | 0.05**   | 0.06**   | 0.07***  | 0.07***  | 0.07***  | 0.04+   |
| 13-100 sub      | 0.02     | 0.05+    | 0.07**   | 0.09**   | 0.08**   | 0.05    |
| 1-12 sub        | 0.02     | 0.03     | 0.08**   | 0.08**   | 0.07*    | 0.03    |
| 13-100 msa      | 0.03     | 0.03     | 0.05*    | 0.04+    | 0.03     | 0.02    |
| 1-12 msa        | 0.07**   | 0.06*    | 0.09**   | 0.08**   | 0.05     | -0.04   |
| new england     | 0.00     | 0.00     | 0.00     | 0.00     | 0.00     | 0.00    |
| middle atlantic | -0.02    | -0.05    | -0.01    | -0.04    | -0.04    | -0.02   |
| e. nor. central | -0.04    | -0.06    | -0.04    | -0.06    | -0.05    | -0.04   |
| w. nor. central | -0.01    | -0.04    | -0.02    | -0.06    | -0.06    | -0.05   |
| south atlantic  | -0.00    | -0.03    | -0.03    | -0.05    | -0.07+   | -0.04   |
| e. sou. central | -0.14*** | -0.16*** | -0.16*** | -0.18*** | -0.19*** | -0.16** |
| w. sou. central | -0.06    | -0.07    | -0.05    | -0.06    | -0.06    | -0.03   |
| mountain        | -0.05    | -0.09+   | -0.05    | -0.09+   | -0.08    | -0.05   |

|                                        |         |          |          |          |          |          |
|----------------------------------------|---------|----------|----------|----------|----------|----------|
| pacific                                | -0.11** | -0.13*** | -0.10**  | -0.12**  | -0.12**  | -0.11*   |
| subjective class identification        |         | -0.07*** |          | -0.02+   | -0.01    | -0.01    |
| family income in \$1986, millions      |         |          | -1.64*** | -1.39*** | -1.08**  | -0.94*   |
| highest year of school completed       |         |          | -0.03*** | -0.02*** | -0.03*** | -0.02*** |
| age                                    |         |          |          |          | -0.00    | -0.01+   |
| age squared                            |         |          |          |          | 0.00     | 0.00     |
| male                                   |         |          |          |          | 0.06***  | 0.06***  |
| married                                |         |          |          |          | 0.01     | 0.02     |
| number of persons in household         |         |          |          |          | -0.01    | -0.01    |
| health                                 |         |          |          |          | -0.03*** | -0.03**  |
| white                                  |         |          |          |          | -0.11*** | -0.16*** |
| liberal                                |         |          |          |          |          | -0.04*   |
| conservative                           |         |          |          |          |          | -0.01    |
| how often r attends religious services |         |          |          |          |          | -0.01*** |
| protestant                             |         |          |          |          |          | 0.00     |
| catholic                               |         |          |          |          |          | 0.09***  |
| jewish                                 |         |          |          |          |          | 0.13*    |
| none                                   |         |          |          |          |          | 0.05     |
| other                                  |         |          |          |          |          | 0.04     |
| constant                               | 0.26*** | 0.43***  | 0.60***  | 0.64***  | 0.94***  | 1.00***  |
| N                                      | 4376    | 3622     | 4049     | 3352     | 3339     | 2534     |

+ 0.10 \* 0.05 \*\* 0.01 \*\*\* 0.001; robust std err.

**Table S8.** no right and wrong ways to make money.

|                 | d1    | d2a   | d2b   | d3    | d4     | d5    |
|-----------------|-------|-------|-------|-------|--------|-------|
| small rur       | 0.00  | 0.00  | 0.00  | 0.00  | 0.00   | 0.00  |
| small urb       | 0.00  | 0.01  | -0.02 | -0.02 | -0.02  | -0.02 |
| 13-100 sub      | -0.02 | -0.00 | -0.03 | -0.03 | -0.02  | -0.03 |
| 1-12 sub        | 0.00  | 0.02  | -0.01 | -0.01 | -0.02  | -0.03 |
| 13-100 msa      | 0.02  | 0.03  | 0.01  | 0.02  | -0.03  | -0.05 |
| 1-12 msa        | 0.06  | 0.07  | 0.04  | 0.04  | 0.04   | 0.02  |
| new england     | 0.00  | 0.00  | 0.00  | 0.00  | 0.00   | 0.00  |
| middle atlantic | -0.06 | -0.07 | -0.05 | -0.05 | -0.10  | -0.08 |
| e. nor. central | -0.08 | -0.08 | -0.07 | -0.06 | -0.13+ | -0.09 |
| w. nor. central | -0.00 | -0.01 | -0.01 | -0.01 | -0.07  | -0.03 |



|                                        |         |         |         |         |          |          |
|----------------------------------------|---------|---------|---------|---------|----------|----------|
| south atlantic                         | -0.07   | -0.07   | -0.07   | -0.07   | -0.13+   | -0.08    |
| e. sou. central                        | -0.08   | -0.09   | -0.08   | -0.08   | -0.21*   | -0.10    |
| w. sou. central                        | -0.08   | -0.09   | -0.10+  | -0.11+  | -0.18*   | -0.08    |
| mountain                               | -0.07   | -0.07   | -0.07   | -0.07   | -0.16*   | -0.13+   |
| pacific                                | 0.01    | 0.00    | 0.01    | 0.01    | -0.06    | -0.06    |
| subjective class identification        |         | -0.05** |         | -0.02   | -0.00    | 0.01     |
| family income in \$1986, millions      |         |         | -0.50   | -0.39   | -0.74    | -0.77    |
| highest year of school completed       |         |         | -0.01** | -0.01** | -0.01    | -0.01    |
| age                                    |         |         |         |         | -0.01    | -0.00    |
| age squared                            |         |         |         |         | 0.00     | 0.00     |
| male                                   |         |         |         |         | 0.10***  | 0.06*    |
| married                                |         |         |         |         | -0.11*** | -0.05    |
| number of persons in household         |         |         |         |         | -0.01    | -0.01    |
| health                                 |         |         |         |         | -0.00    | 0.01     |
| white                                  |         |         |         |         | -0.01    | -0.04    |
| liberal                                |         |         |         |         |          | 0.04     |
| conservative                           |         |         |         |         |          | -0.17*** |
| how often r attends religious services |         |         |         |         |          | -0.05*** |
| protestant                             |         |         |         |         |          | 0.00     |
| catholic                               |         |         |         |         |          | 0.00     |
| jewish                                 |         |         |         |         |          | 0.16     |
| none                                   |         |         |         |         |          | 0.01     |
| other                                  |         |         |         |         |          | -0.01    |
| buddhism                               |         |         |         |         |          | 0.22     |
| hinduism                               |         |         |         |         |          | -0.61*   |
| other eastern                          |         |         |         |         |          | 0.15     |
| moslem/islam                           |         |         |         |         |          | -0.11    |
| orthodox-christian                     |         |         |         |         |          | -0.49    |
| christian                              |         |         |         |         |          | -0.05    |
| native american                        |         |         |         |         |          | 0.41*    |
| inter-nondenominational                |         |         |         |         |          | -0.01    |
| constant                               | 3.03*** | 3.15*** | 3.23*** | 3.25*** | 3.49***  | 3.55***  |
| N                                      | 8269    | 8226    | 7329    | 7305    | 4797     | 4676     |

+ 0.10 \* 0.05 \*\* 0.01 \*\*\* 0.001; robust std err.

**Table S9.** r agrees that morality a personal matter.

|                                        | e1       | e2a      | e2b      | e3       | e4      | e5       |
|----------------------------------------|----------|----------|----------|----------|---------|----------|
| small rur                              | 0.00     | 0.00     | 0.00     | 0.00     | 0.00    | 0.00     |
| small urb                              | 0.02     | 0.01     | -0.00    | -0.00    | -0.02   | -0.04    |
| 13-100 sub                             | 0.07     | 0.05     | 0.03     | 0.03     | 0.02    | -0.00    |
| 1-12 sub                               | 0.13**   | 0.10*    | 0.08     | 0.07     | 0.10    | 0.08     |
| 13-100 msa                             | 0.06     | 0.05     | 0.01     | 0.01     | -0.00   | -0.04    |
| 1-12 msa                               | -0.01    | -0.02    | 0.02     | 0.02     | -0.02   | -0.03    |
| new england                            | 0.00     | 0.00     | 0.00     | 0.00     | 0.00    | 0.00     |
| middle atlantic                        | -0.16**  | -0.15*   | -0.11+   | -0.12+   | -0.05   | -0.03    |
| e. nor. central                        | -0.10    | -0.08    | -0.07    | -0.07    | -0.03   | 0.00     |
| w. nor. central                        | -0.13+   | -0.12+   | -0.09    | -0.10    | -0.05   | -0.01    |
| south atlantic                         | -0.21*** | -0.20*** | -0.16**  | -0.16**  | -0.10   | -0.02    |
| e. sou. central                        | -0.26*** | -0.25*** | -0.24**  | -0.24**  | -0.16+  | -0.03    |
| w. sou. central                        | -0.30*** | -0.29*** | -0.25*** | -0.26*** | -0.22*  | -0.13    |
| mountain                               | -0.10    | -0.09    | -0.08    | -0.08    | -0.04   | -0.01    |
| pacific                                | -0.13*   | -0.11+   | -0.10    | -0.10    | -0.01   | -0.02    |
| subjective class identification        |          | 0.08***  |          | 0.03     | 0.02    | 0.03     |
| family income in \$1986, millions      |          |          | 1.44***  | 1.30**   | 1.06+   | 0.96+    |
| highest year of school completed       |          |          | 0.02***  | 0.02***  | 0.02*** | 0.02***  |
| age                                    |          |          |          |          | 0.01**  | 0.02***  |
| age squared                            |          |          |          |          | -0.00** | -0.00**  |
| male                                   |          |          |          |          | 0.04    | 0.01     |
| married                                |          |          |          |          | -0.11** | -0.06+   |
| number of persons in household         |          |          |          |          | -0.01   | -0.00    |
| health                                 |          |          |          |          | 0.03    | 0.05*    |
| white                                  |          |          |          |          | 0.10**  | 0.08*    |
| liberal                                |          |          |          |          |         | 0.10**   |
| conservative                           |          |          |          |          |         | -0.13*** |
| how often r attends religious services |          |          |          |          |         | -0.04*** |
| protestant                             |          |          |          |          |         | 0.00     |
| catholic                               |          |          |          |          |         | 0.08*    |
| jewish                                 |          |          |          |          |         | -0.06    |
| none                                   |          |          |          |          |         | 0.11*    |
| other                                  |          |          |          |          |         | 0.36**   |
| buddhism                               |          |          |          |          |         | 0.03     |
| hinduism                               |          |          |          |          |         | -0.06    |
| other eastern                          |          |          |          |          |         | -0.54*   |
| moslem/islam                           |          |          |          |          |         | -0.23    |
| orthodox-christian                     |          |          |          |          |         | 0.09     |

|                         |         |         |         |         |         |         |
|-------------------------|---------|---------|---------|---------|---------|---------|
| christian               |         |         |         |         |         | 0.01    |
| native american         |         |         |         |         |         | 0.37    |
| inter-nondenominational |         |         |         |         |         | -0.16   |
| constant                | 2.59*** | 2.39*** | 2.30*** | 2.27*** | 1.79*** | 1.69*** |
| N                       | 8323    | 8278    | 7361    | 7337    | 4822    | 4702    |

+ 0.10 \* 0.05 \*\* 0.01 \*\*\* 0.001; robust std err.

**Table S10.** r disagrees immoral person corrupts society.

|                                   | f1    | f2a      | f2b      | f3       | f4       | f5       |
|-----------------------------------|-------|----------|----------|----------|----------|----------|
| small rur                         | 0.00  | 0.00     | 0.00     | 0.00     | 0.00     | 0.00     |
| small urb                         | 0.01  | 0.01     | 0.03     | 0.03     | 0.05     | 0.05     |
| 13-100 sub                        | -0.01 | 0.02     | 0.05     | 0.05     | 0.05     | 0.04     |
| 1-12 sub                          | -0.02 | 0.03     | 0.06     | 0.08+    | 0.07     | 0.05     |
| 13-100 msa                        | 0.06+ | 0.07     | 0.08*    | 0.07+    | 0.07     | 0.06     |
| 1-12 msa                          | 0.06  | 0.06     | 0.08*    | 0.07     | 0.05     | 0.04     |
| new england                       | 0.00  | 0.00     | 0.00     | 0.00     | 0.00     | 0.00     |
| middle atlantic                   | 0.06  | 0.11*    | 0.05     | 0.09+    | 0.09+    | 0.10+    |
| e. nor. central                   | 0.03  | 0.07     | 0.02     | 0.05     | 0.05     | 0.05     |
| w. nor. central                   | -0.01 | 0.05     | -0.05    | 0.01     | 0.03     | 0.04     |
| south atlantic                    | 0.07+ | 0.12**   | 0.07     | 0.10*    | 0.07     | 0.09+    |
| e. sou. central                   | 0.08  | 0.10+    | 0.04     | 0.06     | 0.10     | 0.11+    |
| w. sou. central                   | 0.11* | 0.13**   | 0.07+    | 0.11*    | 0.08     | 0.08     |
| mountain                          | -0.00 | 0.01     | -0.02    | -0.01    | 0.00     | 0.00     |
| pacific                           | 0.03  | 0.07     | 0.02     | 0.06     | 0.06     | 0.07     |
| subjective class identification   |       | -0.11*** |          | -0.05**  | -0.05*   | -0.06**  |
| family income in \$1986, millions |       |          | -2.41*** | -2.37*** | -1.58*** | -1.60*** |
| highest year of school completed  |       |          | -0.02*** | -0.01**  | -0.01**  | -0.01**  |
| age                               |       |          |          |          | 0.00     | 0.00     |
| age squared                       |       |          |          |          | -0.00    | -0.00    |
| male                              |       |          |          |          | 0.11***  | 0.10***  |
| married                           |       |          |          |          | -0.07*   | -0.08**  |
| number of persons in household    |       |          |          |          | -0.01    | -0.00    |
| health                            |       |          |          |          | -0.02    | -0.02    |
| white                             |       |          |          |          | -0.10*** | -0.11*** |
| liberal                           |       |          |          |          |          | 0.01     |

|                                        |         |         |         |         |         |         |
|----------------------------------------|---------|---------|---------|---------|---------|---------|
| conservative                           |         |         |         |         |         | 0.06*   |
| how often r attends religious services |         |         |         |         |         | -0.01   |
| protestant                             |         |         |         |         |         | 0.00    |
| catholic                               |         |         |         |         |         | 0.03    |
| jewish                                 |         |         |         |         |         | 0.18*   |
| none                                   |         |         |         |         |         | -0.01   |
| other                                  |         |         |         |         |         | -0.04   |
| buddhism                               |         |         |         |         |         | 0.08    |
| hinduism                               |         |         |         |         |         | -0.17   |
| other eastern                          |         |         |         |         |         | -0.17*  |
| moslem/islam                           |         |         |         |         |         | -0.10   |
| orthodox-christian                     |         |         |         |         |         | 0.57*** |
| christian                              |         |         |         |         |         | -0.02   |
| native american                        |         |         |         |         |         | -0.11   |
| inter-nondenominational                |         |         |         |         |         | -0.21   |
| constant                               | 0.27*** | 0.48*** | 0.58*** | 0.59*** | 0.81*** | 0.80*** |
| N                                      | 3495    | 2481    | 3195    | 2309    | 1758    | 1688    |

+ 0.10 \* 0.05 \*\* 0.01 \*\*\* 0.001; robust std err.

**Table S11.** hrsmoney: more and more.

|                 | g1       | g2a      | g2b      | g3       | g4       | g5      |
|-----------------|----------|----------|----------|----------|----------|---------|
| small rur       | 0.00     | 0.00     | 0.00     | 0.00     | 0.00     | 0.00    |
| small urb       | 0.08*    | 0.07*    | 0.05     | 0.05     | 0.02     | 0.01    |
| 13-100 sub      | 0.09*    | 0.08*    | 0.05     | 0.05     | 0.01     | -0.01   |
| 1-12 sub        | 0.18***  | 0.17***  | 0.13**   | 0.14**   | 0.07     | 0.04    |
| 13-100 msa      | 0.18***  | 0.18***  | 0.14**   | 0.15***  | 0.08     | 0.05    |
| 1-12 msa        | 0.08+    | 0.08+    | 0.03     | 0.03     | -0.06    | -0.10   |
| new england     | 0.00     | 0.00     | 0.00     | 0.00     | 0.00     | 0.00    |
| middle atlantic | -0.06    | -0.06    | -0.06    | -0.07    | -0.05    | -0.02   |
| e. nor. central | -0.13**  | -0.13**  | -0.10*   | -0.11*   | -0.08    | -0.01   |
| w. nor. central | -0.10+   | -0.10+   | -0.09    | -0.10+   | -0.09    | -0.03   |
| south atlantic  | -0.26*** | -0.26*** | -0.27*** | -0.27*** | -0.24*** | -0.14*  |
| e. sou. central | -0.36*** | -0.36*** | -0.35*** | -0.36*** | -0.41*** | -0.26** |
| w. sou. central | -0.28*** | -0.27*** | -0.27*** | -0.28*** | -0.32*** | -0.19*  |
| mountain        | -0.17**  | -0.16**  | -0.16**  | -0.17**  | -0.16*   | -0.09   |

|                                        |          |          |         |          |          |          |
|----------------------------------------|----------|----------|---------|----------|----------|----------|
| pacific                                | -0.18*** | -0.18*** | -0.16** | -0.17*** | -0.17*   | -0.16*   |
| subjective class identification        |          | 0.04*    |         | -0.00    | -0.00    | 0.00     |
| family income in \$1986, millions      |          |          | -0.41   | -0.36    | 0.24     | 0.16     |
| highest year of school completed       |          |          | 0.03*** | 0.03***  | 0.04***  | 0.04***  |
| age                                    |          |          |         |          | -0.00    | 0.00     |
| age squared                            |          |          |         |          | 0.00     | 0.00     |
| male                                   |          |          |         |          | -0.06*   | -0.09*** |
| married                                |          |          |         |          | -0.11*** | -0.05+   |
| number of persons in household         |          |          |         |          | -0.01    | -0.00    |
| health                                 |          |          |         |          | -0.02    | -0.00    |
| white                                  |          |          |         |          | 0.00     | -0.02    |
| liberal                                |          |          |         |          |          | 0.03     |
| conservative                           |          |          |         |          |          | -0.20*** |
| how often r attends religious services |          |          |         |          |          | -0.05*** |
| protestant                             |          |          |         |          |          | 0.00     |
| catholic                               |          |          |         |          |          | 0.11***  |
| jewish                                 |          |          |         |          |          | 0.20**   |
| none                                   |          |          |         |          |          | 0.01     |
| other                                  |          |          |         |          |          | 0.02     |
| buddhism                               |          |          |         |          |          | 0.14     |
| hinduism                               |          |          |         |          |          | 0.11     |
| other eastern                          |          |          |         |          |          | 0.28     |
| moslem/islam                           |          |          |         |          |          | 0.10     |
| orthodox-christian                     |          |          |         |          |          | -0.16    |
| christian                              |          |          |         |          |          | 0.06     |
| native american                        |          |          |         |          |          | 0.05     |
| inter-nondenominational                |          |          |         |          |          | -0.05    |
| constant                               | 3.27***  | 3.18***  | 2.93*** | 2.93***  | 3.09***  | 3.00***  |
| N                                      | 8311     | 8267     | 7351    | 7327     | 4808     | 4687     |

+ 0.10 \* 0.05 \*\* 0.01 \*\*\* 0.001; robust std err.

**Table S12.** r agrees right/wrong not black/white.

|           | i1     | i2a     | i2b  | i3    | i4    | i5    |
|-----------|--------|---------|------|-------|-------|-------|
| small rur | 0.00   | 0.00    | 0.00 | 0.00  | 0.00  | 0.00  |
| small urb | -0.11* | -0.16** | 0.00 | -0.04 | -0.09 | -0.09 |

|                                        |         |          |          |          |          |          |
|----------------------------------------|---------|----------|----------|----------|----------|----------|
| 13-100 sub                             | -0.15*  | -0.17*   | 0.06     | 0.01     | -0.09    | -0.10    |
| 1-12 sub                               | -0.04   | -0.06    | 0.22**   | 0.15+    | 0.02     | 0.01     |
| 13-100 msa                             | -0.04   | -0.05    | 0.12+    | 0.13+    | -0.06    | -0.06    |
| 1-12 msa                               | 0.14+   | 0.05     | 0.24**   | 0.19*    | -0.03    | -0.02    |
| new england                            | 0.00    | 0.00     | 0.00     | 0.00     | 0.00     | 0.00     |
| middle atlantic                        | 0.02    | 0.04     | -0.02    | -0.01    | -0.02    | -0.02    |
| e. nor. central                        | -0.06   | -0.12    | -0.09    | -0.13    | -0.16+   | -0.14    |
| w. nor. central                        | -0.16+  | -0.15    | -0.20*   | -0.17+   | -0.23*   | -0.20+   |
| south atlantic                         | 0.04    | 0.07     | 0.04     | 0.03     | 0.01     | 0.02     |
| e. sou. central                        | 0.01    | -0.01    | -0.11    | -0.13    | -0.16    | -0.15    |
| w. sou. central                        | 0.21*   | 0.11     | 0.18*    | 0.11     | 0.04     | 0.04     |
| mountain                               | -0.19*  | -0.18+   | -0.19*   | -0.18+   | -0.24*   | -0.21+   |
| pacific                                | -0.09   | -0.14    | -0.06    | -0.09    | -0.13    | -0.11    |
| subjective class identification        |         | -0.33*** |          | -0.15*** | -0.12**  | -0.09*   |
| family income in \$1986, millions      |         |          | -4.20*** | -3.46*** | -2.99*** | -3.49*** |
| highest year of school completed       |         |          | -0.10*** | -0.10*** | -0.09*** | -0.08*** |
| age                                    |         |          |          |          | 0.00     | -0.00    |
| age squared                            |         |          |          |          | -0.00    | 0.00     |
| male                                   |         |          |          |          | 0.07+    | 0.07     |
| married                                |         |          |          |          | -0.05    | -0.06    |
| number of persons in household         |         |          |          |          | 0.02     | 0.03     |
| health                                 |         |          |          |          | -0.03    | -0.03    |
| white                                  |         |          |          |          | -0.43*** | -0.46*** |
| liberal                                |         |          |          |          |          | -0.07    |
| conservative                           |         |          |          |          |          | -0.01    |
| how often r attends religious services |         |          |          |          |          | -0.01    |
| protestant                             |         |          |          |          |          | 0.00     |
| catholic                               |         |          |          |          |          | 0.04     |
| jewish                                 |         |          |          |          |          | -0.14    |
| none                                   |         |          |          |          |          | -0.02    |
| other                                  |         |          |          |          |          | 0.01     |
| buddhism                               |         |          |          |          |          | -0.56**  |
| hinduism                               |         |          |          |          |          | -0.31    |
| other eastern                          |         |          |          |          |          | -0.12    |
| moslem/islam                           |         |          |          |          |          | -0.44    |
| orthodox-christian                     |         |          |          |          |          | -0.31    |
| christian                              |         |          |          |          |          | -0.02    |
| native american                        |         |          |          |          |          | -0.27+   |
| inter-nondenominational                |         |          |          |          |          | -0.27    |
| constant                               | 2.59*** | 3.48***  | 3.87***  | 4.25***  | 4.56***  | 4.50***  |

|   |      |      |      |      |      |      |
|---|------|------|------|------|------|------|
| N | 5567 | 4040 | 4958 | 3657 | 2781 | 2644 |
|---|------|------|------|------|------|------|

+ 0.10 \* 0.05 \*\* 0.01 \*\*\* 0.001; robust std err.

**Table S13.** job is just a way to earn money.

### 1.5. results using multinomial logit

For ease of exposition, we only present the full model #5 Results are very similar. For the first variable: “honest least desirable,” we have combined top 3 categories, as the top category had only 32 observations and second top only 88 observations.

|                                   | a5                 |                                              |
|-----------------------------------|--------------------|----------------------------------------------|
|                                   | most_desir<br>able | not_menti<br>oned_or_le<br>ast_desirab<br>le |
| country                           | 0.00               | 0.00                                         |
| lt 2.5k                           | 0.00               | -0.03                                        |
| 2.5-10k                           | 0.00               | 0.14                                         |
| 10-50k                            | 0.00               | -0.07                                        |
| uninc med                         | 0.00               | -0.26                                        |
| uninc lrg                         | 0.00               | -0.08                                        |
| med sub                           | 0.00               | 0.07                                         |
| lrg sub                           | 0.00               | -0.06                                        |
| 50-250k                           | 0.00               | 0.21                                         |
| gt 250k                           | 0.00               | 0.30*                                        |
| family income in \$1986, millions | 0.00               | 0.43                                         |
| highest year of school completed  | 0.00               | 0.04*                                        |
| subjective class identification   | 0.00               | 0.06                                         |
| new england                       | 0.00               | 0.00                                         |
| middle atlantic                   | 0.00               | -0.16                                        |
| e. nor. central                   | 0.00               | -0.36                                        |
| w. nor. central                   | 0.00               | -0.28                                        |
| south atlantic                    | 0.00               | -0.39+                                       |
| e. sou. central                   | 0.00               | -0.35                                        |
| w. sou. central                   | 0.00               | -0.21                                        |
| mountain                          | 0.00               | -0.38                                        |
| pacific                           | 0.00               | -0.31                                        |
| age                               | 0.00               | -0.03*                                       |

|                                        |      |         |
|----------------------------------------|------|---------|
| age squared                            | 0.00 | 0.00*   |
| male                                   | 0.00 | 0.15+   |
| married                                | 0.00 | -0.04   |
| number of persons in household         | 0.00 | 0.01    |
| health                                 | 0.00 | -0.06   |
| white                                  | 0.00 | -0.20   |
| liberal                                | 0.00 | -0.02   |
| conservative                           | 0.00 | -0.11   |
| how often r attends religious services | 0.00 | -0.04** |
| protestant                             | 0.00 | 0.00    |
| catholic                               | 0.00 | 0.19+   |
| jewish                                 | 0.00 | -0.07   |
| none                                   | 0.00 | 0.13    |
| other                                  | 0.00 | 0.41    |
| constant                               | 0.00 | -0.10   |
| N                                      | 3032 |         |

+ 0.10 \* 0.05 \*\* 0.01 \*\*\* 0.001; robust std err.

**Table S14.** honest least desirable.

|                                   |      |          |
|-----------------------------------|------|----------|
|                                   | b5   |          |
|                                   | 0    | agree    |
| country                           | 0.00 | 0.00     |
| lt 2.5k                           | 0.00 | 0.22     |
| 2.5-10k                           | 0.00 | 0.51*    |
| 10-50k                            | 0.00 | 0.38     |
| uninc med                         | 0.00 | 0.57*    |
| uninc lrg                         | 0.00 | 0.39+    |
| med sub                           | 0.00 | 0.61*    |
| lrg sub                           | 0.00 | 0.69***  |
| 50-250k                           | 0.00 | 0.55**   |
| gt 250k                           | 0.00 | 0.58**   |
| family income in \$1986, millions | 0.00 | -6.55*   |
| highest year of school completed  | 0.00 | -0.14*** |
| subjective class identification   | 0.00 | 0.13     |
| new england                       | 0.00 | 0.00     |



|                                        |      |          |
|----------------------------------------|------|----------|
| middle atlantic                        | 0.00 | 0.24     |
| e. nor. central                        | 0.00 | -0.00    |
| w. nor. central                        | 0.00 | -0.24    |
| south atlantic                         | 0.00 | -0.04    |
| e. sou. central                        | 0.00 | -0.40    |
| w. sou. central                        | 0.00 | -0.13    |
| mountain                               | 0.00 | -0.28    |
| pacific                                | 0.00 | -0.27    |
| age                                    | 0.00 | 0.01     |
| age squared                            | 0.00 | 0.00     |
| male                                   | 0.00 | 0.14     |
| married                                | 0.00 | 0.21+    |
| number of persons in household         | 0.00 | -0.01    |
| health                                 | 0.00 | -0.07    |
| white                                  | 0.00 | -1.20*** |
| liberal                                | 0.00 | -0.15    |
| conservative                           | 0.00 | -0.10    |
| how often r attends religious services | 0.00 | -0.09*** |
| protestant                             | 0.00 | 0.00     |
| catholic                               | 0.00 | 0.29*    |
| jewish                                 | 0.00 | 0.59*    |
| none                                   | 0.00 | -0.08    |
| other                                  | 0.00 | 0.11     |
| constant                               | 0.00 | 0.69     |
| N                                      | 2573 |          |

+ 0.10 \* 0.05 \*\* 0.01 \*\*\* 0.001; robust std err.

**Table S15.** next to health, money is most important.

|           |      |       |
|-----------|------|-------|
|           | c5   |       |
|           | 0    | agree |
| country   | 0.00 | 0.00  |
| lt 2.5k   | 0.00 | 0.39  |
| 2.5-10k   | 0.00 | 0.20  |
| 10-50k    | 0.00 | 0.33  |
| uninc med | 0.00 | -0.01 |

|                                        |      |          |
|----------------------------------------|------|----------|
| uninc lrg                              | 0.00 | 0.07     |
| med sub                                | 0.00 | 0.03     |
| lrg sub                                | 0.00 | 0.11     |
| 50-250k                                | 0.00 | 0.28     |
| gt 250k                                | 0.00 | -0.16    |
| family income in \$1986, millions      | 0.00 | -6.97*   |
| highest year of school completed       | 0.00 | -0.15*** |
| subjective class identification        | 0.00 | -0.04    |
| new england                            | 0.00 | 0.00     |
| middle atlantic                        | 0.00 | -0.04    |
| e. nor. central                        | 0.00 | -0.18    |
| w. nor. central                        | 0.00 | -0.30    |
| south atlantic                         | 0.00 | -0.23    |
| e. sou. central                        | 0.00 | -1.08**  |
| w. sou. central                        | 0.00 | -0.11    |
| mountain                               | 0.00 | -0.14    |
| pacific                                | 0.00 | -0.69*   |
| age                                    | 0.00 | -0.03+   |
| age squared                            | 0.00 | 0.00     |
| male                                   | 0.00 | 0.35***  |
| married                                | 0.00 | 0.12     |
| number of persons in household         | 0.00 | -0.05    |
| health                                 | 0.00 | -0.18**  |
| white                                  | 0.00 | -0.81*** |
| liberal                                | 0.00 | -0.29*   |
| conservative                           | 0.00 | -0.07    |
| how often r attends religious services | 0.00 | -0.09*** |
| protestant                             | 0.00 | 0.00     |
| catholic                               | 0.00 | 0.54***  |
| jewish                                 | 0.00 | 0.84**   |
| none                                   | 0.00 | 0.24     |
| other                                  | 0.00 | 0.30     |
| constant                               | 0.00 | 3.39***  |
| N                                      | 2534 |          |

+ 0.10 \* 0.05 \*\* 0.01 \*\*\* 0.001; robust std err.

**Table S16.** no right and wrong ways to make money.

|                                        | d5                |                   |                |                |
|----------------------------------------|-------------------|-------------------|----------------|----------------|
|                                        | disagree_strongly | disagree_somewhat | agree_somewhat | agree_strongly |
| country                                | 0.00              | 0.00              | 0.00           | 0.00           |
| lt 2.5k                                | -0.31             | 0.49              | 0.00           | 0.05           |
| 2.5-10k                                | 0.15              | 0.22              | 0.00           | -0.05          |
| 10-50k                                 | 0.30              | 0.16              | 0.00           | 0.04           |
| uninc med                              | 0.48+             | 0.38+             | 0.00           | 0.16           |
| uninc lrg                              | 0.03              | 0.18              | 0.00           | -0.23          |
| med sub                                | 0.60*             | 0.35+             | 0.00           | 0.13           |
| lrg sub                                | 0.28              | 0.44*             | 0.00           | 0.21           |
| 50-250k                                | 0.03              | 0.31+             | 0.00           | -0.06          |
| gt 250k                                | -0.11             | 0.10              | 0.00           | -0.05          |
| family income in \$1986, millions      | 1.28              | 0.48              | 0.00           | -1.61          |
| highest year of school completed       | 0.02              | 0.02              | 0.00           | -0.01          |
| subjective class identification        | -0.32**           | -0.02             | 0.00           | -0.11+         |
| new england                            | 0.00              | 0.00              | 0.00           | 0.00           |
| middle atlantic                        | -0.11             | -0.22             | 0.00           | -0.42*         |
| e. nor. central                        | 0.20              | -0.16             | 0.00           | -0.32+         |
| w. nor. central                        | 0.09              | -0.22             | 0.00           | -0.24          |
| south atlantic                         | 0.16              | -0.23             | 0.00           | -0.31          |
| e. sou. central                        | 0.29              | -0.27             | 0.00           | -0.39+         |
| w. sou. central                        | 0.31              | 0.08              | 0.00           | -0.14          |
| mountain                               | 0.56              | -0.21             | 0.00           | -0.29          |
| pacific                                | 0.30              | 0.03              | 0.00           | -0.13          |
| age                                    | 0.09***           | 0.00              | 0.00           | 0.02           |
| age squared                            | -0.00**           | -0.00             | 0.00           | -0.00          |
| male                                   | 0.05              | -0.08             | 0.00           | 0.16*          |
| married                                | -0.01             | 0.08              | 0.00           | -0.11          |
| number of persons in household         | 0.04              | 0.00              | 0.00           | -0.01          |
| health                                 | 0.07              | -0.01             | 0.00           | 0.05           |
| white                                  | -0.13             | 0.34**            | 0.00           | 0.02           |
| liberal                                | 0.09              | 0.07              | 0.00           | 0.21*          |
| conservative                           | 0.74***           | 0.27**            | 0.00           | -0.03          |
| how often r attends religious services | 0.18***           | 0.02              | 0.00           | -0.06***       |
| protestant                             | 0.00              | 0.00              | 0.00           | 0.00           |
| catholic                               | -0.19             | -0.13             | 0.00           | -0.15+         |

|                         |           |           |      |       |
|-------------------------|-----------|-----------|------|-------|
| jewish                  | 0.22      | 0.03      | 0.00 | 0.50+ |
| none                    | 0.35      | 0.12      | 0.00 | 0.20+ |
| other                   | -1.48     | 0.09      | 0.00 | -0.30 |
| buddhism                | -0.55     | -0.40     | 0.00 | 0.36  |
| hinduism                | 1.77+     | 0.19      | 0.00 | -1.29 |
| other eastern           | -12.39*** | -13.32*** | 0.00 | -0.89 |
| moslem/islam            | 0.45      | 0.83      | 0.00 | 0.26  |
| orthodox-christian      | 1.70*     | -0.93     | 0.00 | -0.44 |
| christian               | 0.41      | 0.06      | 0.00 | 0.07  |
| native american         | -13.11*** | -12.61*** | 0.00 | -0.09 |
| inter-nondenominational | 0.61      | 0.78      | 0.00 | 0.64  |
| constant                | -5.35***  | -1.42**   | 0.00 | 0.11  |
| N                       | 4676      |           |      |       |

+ 0.10 \* 0.05 \*\* 0.01 \*\*\* 0.001; robust std err.

**Table S17.** r agrees that morality a personal matter.

|                                   | e5             |                |                   |                   |
|-----------------------------------|----------------|----------------|-------------------|-------------------|
|                                   | agree_strongly | agree_somewhat | disagree_somewhat | disagree_strongly |
| country                           | 0.00           | 0.00           | 0.00              | 0.00              |
| lt 2.5k                           | -0.64+         | 0.00           | 0.22              | -0.12             |
| 2.5-10k                           | -0.06          | 0.00           | 0.13              | 0.29              |
| 10-50k                            | -0.09          | 0.00           | 0.25              | 0.09              |
| uninc med                         | -0.09          | 0.00           | 0.26              | 0.23              |
| uninc lrg                         | -0.36*         | 0.00           | 0.04              | -0.08             |
| med sub                           | -0.14          | 0.00           | 0.21              | 0.08              |
| lrg sub                           | 0.10           | 0.00           | 0.49**            | 0.32+             |
| 50-250k                           | -0.06          | 0.00           | 0.27+             | -0.16             |
| gt 250k                           | 0.07           | 0.00           | 0.31+             | 0.32              |
| family income in \$1986, millions | -1.53          | 0.00           | 2.22              | 0.83              |
| highest year of school completed  | -0.05***       | 0.00           | -0.00             | 0.02              |
| subjective class identification   | -0.15*         | 0.00           | -0.07             | -0.01             |
| new england                       | 0.00           | 0.00           | 0.00              | 0.00              |
| middle atlantic                   | -0.16          | 0.00           | 0.02              | -0.39             |
| e. nor. central                   | -0.21          | 0.00           | 0.01              | -0.23             |

|                                        |          |      |         |           |
|----------------------------------------|----------|------|---------|-----------|
| w. nor. central                        | -0.25    | 0.00 | -0.07   | -0.31     |
| south atlantic                         | -0.06    | 0.00 | 0.08    | -0.21     |
| e. sou. central                        | 0.16     | 0.00 | 0.35    | -0.15     |
| w. sou. central                        | -0.09    | 0.00 | -0.15   | -0.58*    |
| mountain                               | -0.21    | 0.00 | -0.06   | -0.34     |
| pacific                                | -0.02    | 0.00 | -0.21   | -0.07     |
| age                                    | 0.04**   | 0.00 | 0.04**  | 0.10***   |
| age squared                            | -0.00*   | 0.00 | -0.00** | -0.00***  |
| male                                   | 0.14+    | 0.00 | -0.00   | 0.21*     |
| married                                | 0.10     | 0.00 | 0.05    | -0.20+    |
| number of persons in household         | 0.01     | 0.00 | 0.01    | 0.01      |
| health                                 | -0.03    | 0.00 | 0.03    | 0.13*     |
| white                                  | -0.34*** | 0.00 | 0.11    | -0.17     |
| liberal                                | -0.05    | 0.00 | 0.23*   | 0.23*     |
| conservative                           | 0.36***  | 0.00 | -0.08   | -0.05     |
| how often r attends religious services | 0.05**   | 0.00 | -0.04** | -0.07***  |
| protestant                             | 0.00     | 0.00 | 0.00    | 0.00      |
| catholic                               | -0.09    | 0.00 | 0.13    | 0.10      |
| jewish                                 | 0.63+    | 0.00 | 0.27    | 0.28      |
| none                                   | -0.16    | 0.00 | 0.18    | 0.17      |
| other                                  | -0.72    | 0.00 | 0.76*   | 0.43      |
| buddhism                               | 0.35     | 0.00 | 0.85+   | -0.09     |
| hinduism                               | 1.35     | 0.00 | 0.72    | 1.12      |
| other eastern                          | 0.30     | 0.00 | -0.89   | -14.25*** |
| moslem/islam                           | 0.81     | 0.00 | 0.34    | -0.25     |
| orthodox-christian                     | -0.03    | 0.00 | 0.74    | -0.41     |
| christian                              | 0.26     | 0.00 | 0.10    | 0.32      |
| native american                        | 15.27*** | 0.00 | 0.30    | 16.14***  |
| inter-nondenominational                | 1.32*    | 0.00 | 0.74    | 0.84      |
| constant                               | -0.33    | 0.00 | -1.51** | -3.18***  |
| N                                      | 4702     |      |         |           |

+ 0.10 \* 0.05 \*\* 0.01 \*\*\* 0.001; robust std err.

**Table S18.** r disagrees immoral person corrupts society.

|         |      |      |
|---------|------|------|
|         | f5   |      |
|         | 0    | 1    |
| country | 0.00 | 0.00 |
| lt 2.5k | 0.00 | 0.06 |

|                                        |      |           |
|----------------------------------------|------|-----------|
| 2.5-10k                                | 0.00 | 0.27      |
| 10-50k                                 | 0.00 | 0.11      |
| uninc med                              | 0.00 | -0.38     |
| uninc lrg                              | 0.00 | -0.17     |
| med sub                                | 0.00 | 0.22      |
| lrg sub                                | 0.00 | 0.09      |
| 50-250k                                | 0.00 | -0.01     |
| gt 250k                                | 0.00 | 0.10      |
| family income in \$1986, millions      | 0.00 | -9.62***  |
| highest year of school completed       | 0.00 | -0.06**   |
| subjective class identification        | 0.00 | -0.28**   |
| new england                            | 0.00 | 0.00      |
| middle atlantic                        | 0.00 | 0.52+     |
| e. nor. central                        | 0.00 | 0.27      |
| w. nor. central                        | 0.00 | 0.17      |
| south atlantic                         | 0.00 | 0.52+     |
| e. sou. central                        | 0.00 | 0.61+     |
| w. sou. central                        | 0.00 | 0.37      |
| mountain                               | 0.00 | 0.04      |
| pacific                                | 0.00 | 0.39      |
| age                                    | 0.00 | 0.02      |
| age squared                            | 0.00 | -0.00     |
| male                                   | 0.00 | 0.47***   |
| married                                | 0.00 | -0.37**   |
| number of persons in household         | 0.00 | -0.02     |
| health                                 | 0.00 | -0.10     |
| white                                  | 0.00 | -0.49***  |
| liberal                                | 0.00 | 0.03      |
| conservative                           | 0.00 | 0.29*     |
| how often r attends religious services | 0.00 | -0.04     |
| protestant                             | 0.00 | 0.00      |
| catholic                               | 0.00 | 0.18      |
| jewish                                 | 0.00 | 0.91*     |
| none                                   | 0.00 | -0.05     |
| other                                  | 0.00 | -0.16     |
| buddhism                               | 0.00 | 0.39      |
| hinduism                               | 0.00 | -0.93     |
| other eastern                          | 0.00 | -13.02*** |
| moslem/islam                           | 0.00 | -0.53     |
| orthodox-christian                     | 0.00 | 15.19***  |

|                         |      |           |
|-------------------------|------|-----------|
| christian               | 0.00 | -0.10     |
| native american         | 0.00 | -12.79*** |
| inter-nondenominational | 0.00 | -1.44     |
| constant                | 0.00 | 1.47+     |
| N                       | 1688 |           |

+ 0.10 \* 0.05 \*\* 0.01 \*\*\* 0.001; robust std err.

**Table S19.** hrsmoney: more and more.

|                                   | g5                |                   |                |                |
|-----------------------------------|-------------------|-------------------|----------------|----------------|
|                                   | disagree_strongly | disagree_somewhat | agree_somewhat | agree_strongly |
| country                           | 0.00              | 0.00              | 0.00           | 0.00           |
| lt 2.5k                           | -0.07             | 0.35              | 0.43           | 0.00           |
| 2.5-10k                           | -0.30             | 0.38              | -0.14          | 0.00           |
| 10-50k                            | 0.30              | 0.28              | -0.16          | 0.00           |
| uninc med                         | 0.01              | -0.20             | -0.04          | 0.00           |
| uninc lrg                         | -0.11             | 0.24              | 0.16           | 0.00           |
| med sub                           | 0.11              | -0.00             | -0.06          | 0.00           |
| lrg sub                           | -0.10             | -0.08             | -0.05          | 0.00           |
| 50-250k                           | -0.05             | -0.03             | 0.07           | 0.00           |
| gt 250k                           | -0.06             | 0.30              | 0.08           | 0.00           |
| family income in \$1986, millions | -0.50             | -0.44             | -0.99          | 0.00           |
| highest year of school completed  | -0.16***          | -0.12***          | -0.08***       | 0.00           |
| subjective class identification   | -0.11             | 0.10              | 0.11+          | 0.00           |
| new england                       | 0.00              | 0.00              | 0.00           | 0.00           |
| middle atlantic                   | 0.10              | -0.04             | 0.18           | 0.00           |
| e. nor. central                   | -0.11             | 0.01              | 0.23           | 0.00           |
| w. nor. central                   | 0.09              | 0.12              | 0.10           | 0.00           |
| south atlantic                    | 0.45              | 0.38              | 0.32+          | 0.00           |
| e. sou. central                   | 0.86+             | 0.66+             | 0.39+          | 0.00           |
| w. sou. central                   | 0.73+             | 0.39              | 0.22           | 0.00           |
| mountain                          | 0.38              | 0.26              | 0.06           | 0.00           |
| pacific                           | 0.78+             | 0.28              | 0.25           | 0.00           |
| age                               | 0.03              | -0.03             | -0.03*         | 0.00           |
| age squared                       | -0.00             | 0.00              | 0.00*          | 0.00           |

|                                        |           |         |           |      |
|----------------------------------------|-----------|---------|-----------|------|
| male                                   | 0.24+     | 0.43*** | 0.25***   | 0.00 |
| married                                | 0.18      | 0.14    | 0.17*     | 0.00 |
| number of persons in household         | 0.02      | 0.02    | -0.04     | 0.00 |
| health                                 | 0.09      | -0.11   | -0.04     | 0.00 |
| white                                  | 0.06      | 0.03    | -0.06     | 0.00 |
| liberal                                | -0.02     | -0.19   | -0.22**   | 0.00 |
| conservative                           | 0.79***   | 0.66*** | 0.05      | 0.00 |
| how often r attends religious services | 0.24***   | 0.12*** | 0.04**    | 0.00 |
| protestant                             | 0.00      | 0.00    | 0.00      | 0.00 |
| catholic                               | -0.83***  | -0.13   | 0.10      | 0.00 |
| jewish                                 | -14.22*** | -0.09   | -0.56*    | 0.00 |
| none                                   | -0.02     | 0.02    | -0.27*    | 0.00 |
| other                                  | 0.34      | -0.35   | -0.54+    | 0.00 |
| buddhism                               | -0.82     | -0.08   | -0.66     | 0.00 |
| hinduism                               | -13.90*** | -0.04   | -0.62     | 0.00 |
| other eastern                          | -14.67*** | 0.33    | -15.67*** | 0.00 |
| moslem/islam                           | -14.69*** | 0.42    | -0.38     | 0.00 |
| orthodox-christian                     | 0.70      | 0.55    | 0.30      | 0.00 |
| christian                              | 0.06      | -0.47   | -0.62**   | 0.00 |
| native american                        | -20.04*** | 1.09    | -19.26*** | 0.00 |
| inter-nondenominational                | 0.70      | -0.74   | -0.67     | 0.00 |
| constant                               | -2.29**   | -0.38   | 1.24**    | 0.00 |
| N                                      | 4687      |         |           |      |

+ 0.10 \* 0.05 \*\* 0.01 \*\*\* 0.001; robust std err.

**Table S20.** r agrees right/wrong not black/white.

|           | i5                    |          |         |        |                    |
|-----------|-----------------------|----------|---------|--------|--------------------|
|           | strongly_d<br>isagree | disagree | neither | agree  | strongly_a<br>gree |
| country   | 0.00                  | 0.00     | 0.00    | 0.00   | 0.00               |
| lt 2.5k   | -0.45                 | 0.00     | 0.36    | 0.36   | 0.77               |
| 2.5-10k   | 0.03                  | 0.00     | 0.57+   | 0.98** | 1.11+              |
| 10-50k    | 0.36                  | 0.00     | -0.38   | 0.49   | 1.01+              |
| uninc med | 0.28                  | 0.00     | 0.16    | 0.09   | 1.14+              |
| uninc lrg | -0.16                 | 0.00     | -0.09   | 0.72+  | 0.80               |



|                                        |           |      |           |           |           |
|----------------------------------------|-----------|------|-----------|-----------|-----------|
| med sub                                | 0.04      | 0.00 | 0.18      | 0.41      | 1.20*     |
| lrg sub                                | -0.20     | 0.00 | -0.00     | 0.47      | 0.60      |
| 50-250k                                | -0.00     | 0.00 | -0.21     | 0.63+     | 1.02+     |
| gt 250k                                | 0.15      | 0.00 | -0.12     | 0.53      | 1.13*     |
| family income in \$1986, millions      | 0.55      | 0.00 | -5.30+    | -7.51*    | -15.56**  |
| highest year of school completed       | 0.10***   | 0.00 | -0.06*    | -0.13***  | -0.17***  |
| subjective class identification        | 0.14      | 0.00 | -0.14     | -0.14     | -0.14     |
| new england                            | 0.00      | 0.00 | 0.00      | 0.00      | 0.00      |
| middle atlantic                        | 0.21      | 0.00 | 0.12      | -0.24     | 0.49      |
| e. nor. central                        | 0.56+     | 0.00 | 0.13      | -0.24     | 0.23      |
| w. nor. central                        | 0.72*     | 0.00 | 0.09      | -0.18     | -0.23     |
| south atlantic                         | 0.54+     | 0.00 | 0.14      | 0.11      | 0.59      |
| e. sou. central                        | 0.54      | 0.00 | -0.19     | -0.38     | 0.40      |
| w. sou. central                        | 0.25      | 0.00 | 0.35      | -0.08     | 0.57      |
| mountain                               | 0.36      | 0.00 | -0.13     | -0.48     | -0.23     |
| pacific                                | 0.70*     | 0.00 | 0.46      | -0.22     | 0.26      |
| age                                    | 0.02      | 0.00 | -0.04+    | 0.00      | 0.03      |
| age squared                            | -0.00     | 0.00 | 0.00+     | 0.00      | -0.00     |
| male                                   | 0.06      | 0.00 | 0.18      | 0.30*     | 0.09      |
| married                                | -0.07     | 0.00 | -0.02     | -0.10     | -0.31     |
| number of persons in household         | -0.03     | 0.00 | 0.04      | 0.07      | 0.05      |
| health                                 | 0.05      | 0.00 | -0.09     | -0.00     | -0.04     |
| white                                  | 0.37+     | 0.00 | -0.19     | -0.73***  | -0.97***  |
| liberal                                | 0.25+     | 0.00 | -0.09     | -0.19     | 0.17      |
| conservative                           | 0.07      | 0.00 | -0.17     | -0.17     | 0.30      |
| how often r attends religious services | 0.01      | 0.00 | 0.02      | -0.04+    | -0.01     |
| protestant                             | 0.00      | 0.00 | 0.00      | 0.00      | 0.00      |
| catholic                               | 0.13      | 0.00 | 0.08      | 0.14      | 0.22      |
| jewish                                 | -0.10     | 0.00 | -0.08     | -1.13     | -0.16     |
| none                                   | -0.03     | 0.00 | -0.03     | -0.28     | 0.23      |
| other                                  | 0.46      | 0.00 | -0.19     | 0.48      | 0.22      |
| buddhism                               | 0.42      | 0.00 | -0.28     | -14.43*** | -13.95*** |
| hinduism                               | -0.74     | 0.00 | -14.64*** | -0.44     | -14.21*** |
| other eastern                          | 0.70      | 0.00 | -14.06*** | 1.13      | -13.44*** |
| moslem/islam                           | -0.50     | 0.00 | 0.17      | -15.15*** | -0.82     |
| orthodox-christian                     | 0.16      | 0.00 | -14.51*** | -0.11     | -14.43*** |
| christian                              | 1.45**    | 0.00 | 0.49      | 0.65      | 1.19+     |
| native american                        | -15.98*** | 0.00 | -15.21*** | -14.58*** | -13.50*** |
| inter-nondenominational                | 0.47      | 0.00 | 0.95      | -0.61     | -13.77*** |
| constant                               | -4.26***  | 0.00 | 1.34+     | 1.22      | -0.19     |

|   |      |  |  |  |  |
|---|------|--|--|--|--|
| N | 2644 |  |  |  |  |
|---|------|--|--|--|--|

+ 0.10 \* 0.05 \*\* 0.01 \*\*\* 0.001; robust std err.

**Table S21.** job is just a way to earn money.

## References

- Amin, A. The good city. *Urban Stud.* **2006**, *43*, 1009–1023.
- Bettencourt, L.; West, G. A unified theory of urban living. *Nature* **2010**, *467*, 912–913.
- Bettencourt, L.M.; Lobo, J.; Helbing, D.; Kühnert, C.; West, G.B. Growth, innovation, scaling, and the pace of life in cities. *Proc. Natl. Acad. Sci. USA* **2007**, *104*, 7301–7306.
- Bettencourt, L.M.; Lobo, J.; Strumsky, D.; West, G.B. Urban scaling and its deviations: Revealing the structure of wealth, innovation and crime across cities. *PLoS ONE* **2010**, *5*, e13541.
- Burgess, E.W. *The Urban Community: Selected Papers from the Proceedings of the American Sociological Society, 1925*; The University of Chicago press: Chicago, IL, USA, 1926; Volume 4.
- Calhoun, J.B. Population density and social pathology. *Sci. Am.* **1962**, *206*, 139–149.
- Choi, B.-D. Urban alienation and the just city. *J. Korean Assoc. Reg. Geogr.* **2016**, *22*, 576–598.
- Glaeser, E. *Triumph of the City: How Our Greatest Invention Makes Us Richer, Smarter, Greener, Healthier, and Happier*; Penguin Press: New York, NY, USA, 2011.
- Haidt, J. *The Righteous Mind: Why Good People Are Divided by Politics and Religion*; Vintage: New York, NY, USA, 2012.
- Harvey, D. *Senior Loeb Scholar Lecture*; Harvard GSD: Cambridge, MA, USA, 2016.
- Knox, P.; Pinch, S. *Urban Social Geography: An Introduction*; Routledge: London, UK, 2014.
- Parker, J.H. The urbanism-alienation hypothesis: A critique. *Int. Rev. Mod. Sociol.* **1978**, *8*, 239–244.
- Pile, S. *Real Cities: Modernity, Space and the Phantasmagorias of City Life*; Sage: Beverly Hills, CA, USA, 2005.
- Pile, S. Spectral Cities: Where the Repressed Returns and Other Short Stories. In *Habitus: A Sense of Place*; Hillier, J., Rooksby, E., Eds.; Ashgate Aldershot: Aldershot, UK, 2005.
- Pile, S.; Brook, C.; Mooney, G. *Unruly Cities: Order/Disorder*; Routledge: London, UK, 1999.
- Rosenthal, S.S.; Strange, W.C. Agglomeration and hours worked. *Rev. Econ. Stat.* **2008**, *90*, 105–118.
- Rosenthal, S.S.; Strange, W.C. Agglomeration, Labor Supply, and the Urban Rat Race. *Cent. Policy Res. Work. Pap.* **2003**.
- Rosenthal, S.S.; Strange, W.C. The urban rat race. *Syracuse Univ. Work.* **2002**.
- Thrift, N. But malice aforethought: Cities and the natural history of hatred. *Trans. Inst. Br. Geogr.* **2005**, *30*, 133–150.
- Vaneigem, R. Comments against urbanism. *October* **1997**, *79*, 123–128.
- White, M.G.; White, L. *The Intellectual versus the City: From Thomas Jefferson to Frank Lloyd Wright*; Oxford University Press: Oxford, UK, 1977.
- Yang, D.Y.-R. A tale of Foxconn city: Urban village, migrant workers and alienated urbanism. In *Rural Migrants in Urban China*; Routledge: London, UK, 2013; pp. 171–187.
